# Supplementary material
Source: publisher figshare collection journal article supplement (https://acs.figshare.com/ndownloader/files/14303558)
Supplement: Supplementary file 1 [file 14303558]

## Supporting Information

### Selective oxidation of 5-hydroxymethylfurfural to 5-hydroxymethyl-2-furancarboxylic acid using *Gluconobacter oxydans*

Mahmoud Sayed <sup>a, b</sup>, Sang-Hyun Pyo <sup>a,\*</sup>, Nicola Rehnberg <sup>c</sup> and Rajni Hatti-Kaul <sup>a</sup>

<sup>a</sup> Biotechnology, Department of Chemistry, Center for Chemistry and Chemical Engineering, Lund University, Box 124, SE-22100 Lund, Sweden.

<sup>b</sup> Department of Botany, Faculty of Science, South Valley University, Qena, Egypt.

<sup>c</sup> Strategic R&D, Bona AB, Box 210 74, 200 21 Malmö, Sweden.

Figure S1. <sup>1</sup>H-NMR of 5-hydroxymethyl-2-furan carboxylic acid (HMFCFA) in DMSO-d<sub>6</sub>

\* *Corresponding author*

Tel: +46-46-222-4838; Fax: +46-46-222-4713

E-mail: sang-hyun.pyo@biotek.lu.se (S.-H. Pyo)

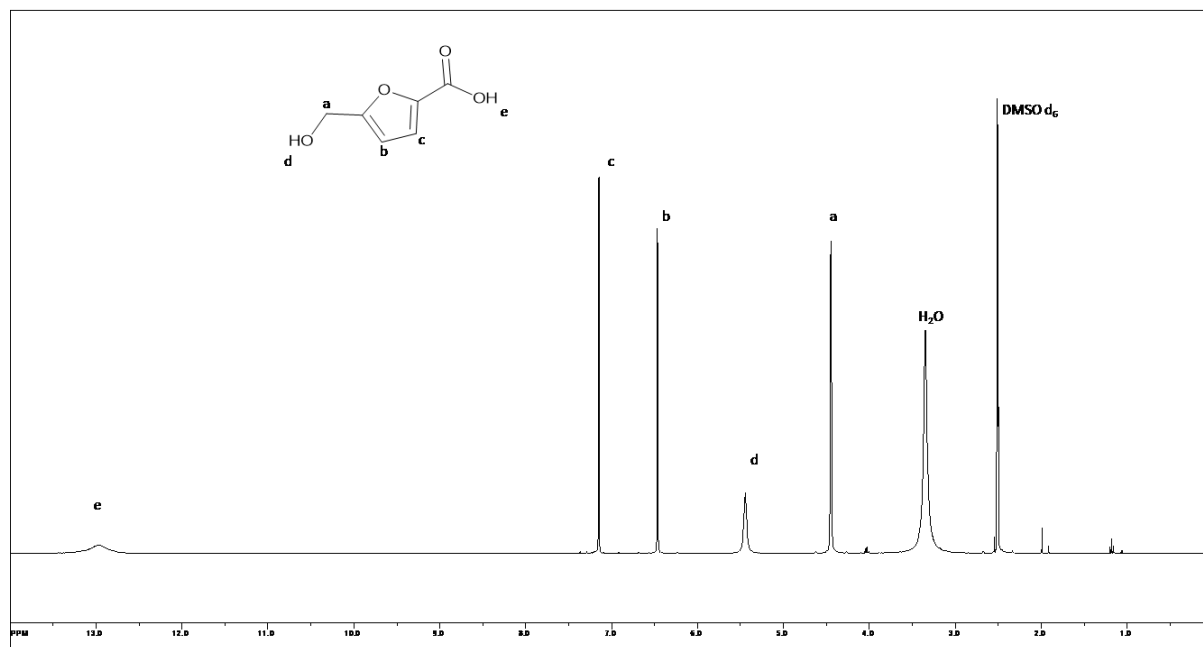

Figure S1.  $^1\text{H}$ -NMR of 5-hydroxymethyl-2-furan carboxylic acid (HMFCA) in  $\text{DMSO-d}_6$ .
